# Supplementary material for: A solvent-responsive terbium-organic framework for photocatalytic CO2reduction
Source: Royal Society of Chemistry journal article supplement (doi:10.1039/d3dt01763j), 2023-01-01
Supplement: d3dt01763j1.pdf [file d3dt01763j1.pdf]

*Supplementary Information*

**Response to solvent stimulation of terbium-organic framework for photocatalysis CO<sub>2</sub> reduction**

Xin Lu<sup>‡a</sup>, Zhilong Yao<sup>‡a</sup>, Xiaomin Yuan<sup>a</sup>, Yao Wei<sup>a</sup>, Zhihao Zhu<sup>\*a</sup>, Hegen Zheng<sup>\*b</sup>, Chuanlei Zhang<sup>\*ab</sup>

*a. Anhui Key Laboratory of Photoelectric-Magnetic Functional Materials, Anhui Key Laboratory of Functional Coordination Compounds, School of Chemistry and Engineering, Anqing Normal University, Anqing 246011, China.*

*b. State Key Laboratory of Coordination Chemistry, School of Chemistry and Chemical Engineering, Collaborative Innovation Center of Advanced Microstructures, Nanjing University, Nanjing 210023, P. R. China*

**Tab. S1** Crystal data and structural refinements parameters of AQNU-4.

| Complex                                                                              | AQNU-4                                             |
|--------------------------------------------------------------------------------------|----------------------------------------------------|
| Empirical formula                                                                    | C <sub>39</sub> H <sub>57</sub> O <sub>20</sub> Tb |
| Formula weight                                                                       | 1018.78                                            |
| Crystal system                                                                       | Triclinic                                          |
| Space group                                                                          | <i>P</i> Error!                                    |
| <i>a</i> / Å                                                                         | 9.4513(4) Å                                        |
| <i>b</i> / Å                                                                         | 15.2354(7)                                         |
| <i>c</i> / Å                                                                         | 18.4015(8)                                         |
| $\alpha$ / °                                                                         | 108.9470(10)                                       |
| $\beta$ / °                                                                          | 95.4730(10)                                        |
| $\gamma$ / °                                                                         | 93.3720(10)                                        |
| <i>V</i> / Å <sup>3</sup>                                                            | 2483.35(19)                                        |
| <i>Z</i>                                                                             | 2                                                  |
| <i>D</i> <sub>calcd</sub> / g cm <sup>-3</sup>                                       | 1.072                                              |
| $\mu$ / mm <sup>-1</sup>                                                             | 1.465                                              |
| <i>F</i> (000)                                                                       | 926                                                |
| $\theta$ min-max / °                                                                 | 1.420, 28.392                                      |
| Tot., uniq. data                                                                     | 18150, 12291                                       |
| <i>R</i> (int)                                                                       | 0.0759                                             |
| Nres, Npar                                                                           | 7, 436                                             |
| <i>R</i> <sub>1</sub> , <i>wR</i> <sub>2</sub> [ <i>I</i> > 2 $\sigma$ ( <i>I</i> )] | 0.0426, 0.0843                                     |
| <i>R</i> <sub>1</sub> , <i>wR</i> <sub>2</sub> [ <i>all data</i> ]                   | 0.0565, 0.0868                                     |
| GOF on <i>F</i> <sup>2</sup>                                                         | 1.064                                              |
| Min. and max resd dens (e <sup>-</sup> Å <sup>-3</sup> )                             | -1.027, 1.731                                      |

**Tab. S2** Selected Bond Lengths (Å) and Angles (deg) for AQNU-4.

| AQNU-4            |            |                    |            |
|-------------------|------------|--------------------|------------|
| O(8)-Tb(1)#1      | 2.337(3)   | Tb(1)-O(1)         | 2.304(3)   |
| O(1W)-Tb(1)       | 2.574(3)   | Tb(1)-O(2W)        | 2.516(3)   |
| Tb(1)-O(2)#1      | 2.380(3)   | Tb(1)-O(7)         | 2.340(2)   |
| Tb(1)-O(4)#3      | 2.341(2)   | Tb(1)-O(3)#2       | 2.321(3)   |
| O(1)-Tb(1)-O(8)#1 | 73.64(10)  | O(1)-Tb(1)-O(3)#2  | 144.11(11) |
| O(2W)-Tb(1)-O(1W) | 126.18(10) | O(2)#1-Tb(1)-O(1W) | 69.53(10)  |

|                     |            |                     |            |
|---------------------|------------|---------------------|------------|
| O(7)-Tb(1)-O(1W)    | 138.59(11) | O(4)#3-Tb(1)-O(1W)  | 69.09(11)  |
| O(3)#2-Tb(1)-O(1W)  | 69.82(11)  | O(8)#1-Tb(1)-O(1W)  | 70.83(11)  |
| O(1)-Tb(1)-O(1W)    | 139.30(11) | O(2)#1-Tb(1)-O(2W)  | 138.42(10) |
| O(7)-Tb(1)-O(2W)    | 69.95(10)  | O(4)#3-Tb(1)-O(2W)  | 73.15(10)  |
| O(3)#2-Tb(1)-O(2W)  | 72.09(11)  | O(8)#1-Tb(1)-O(2W)  | 138.41(11) |
| O(1)-Tb(1)-O(2W)    | 72.45(11)  | O(7)-Tb(1)-O(2)#1   | 75.78(10)  |
| O(4)#3-Tb(1)-O(2)#1 | 138.42(11) | O(3)#2-Tb(1)-O(2)#1 | 81.46(10)  |
| O(8)#1-Tb(1)-O(2)#1 | 81.30(10)  | O(1)-Tb(1)-O(2)#1   | 123.59(9)  |
| O(4)#3-Tb(1)-O(7)   | 142.97(10) | O(3)#2-Tb(1)-O(7)   | 83.53(9)   |
| O(8)#1-Tb(1)-O(7)   | 125.64(9)  | O(1)-Tb(1)-O(7)     | 79.39(10)  |
| O(3)#2-Tb(1)-O(4)#3 | 88.16(9)   | O(8)#1-Tb(1)-O(4)#3 | 81.68(9)   |
| O(1)-Tb(1)-O(4)#3   | 86.86(10)  | O(8)#1-Tb(1)-O(3)#2 | 140.44(11) |

Symmetry Codes for **1**: #1 =  $-x + 2, -y + 1, -z + 2$ ; #2 =  $x, y, z + 1$ ; #3 =  $-x + 1, -y + 1, -z + 1$ ; #4 =  $-x + 2, -y + 2, -z + 3$ ; #5 =  $x, y, z - 1$ .

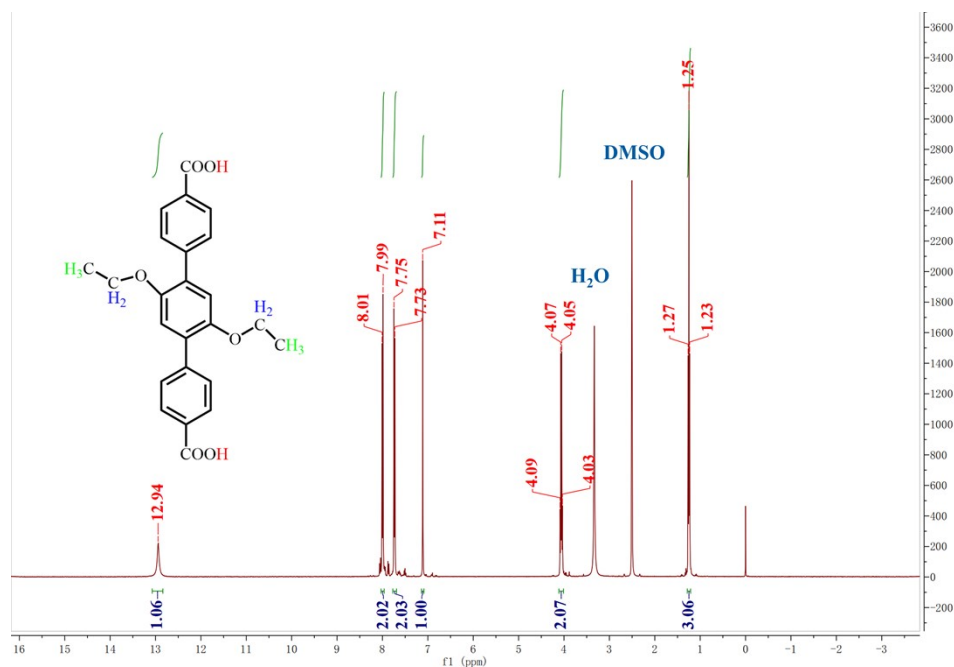

**Fig. S1** <sup>1</sup>H NMR spectrum of DTDA.

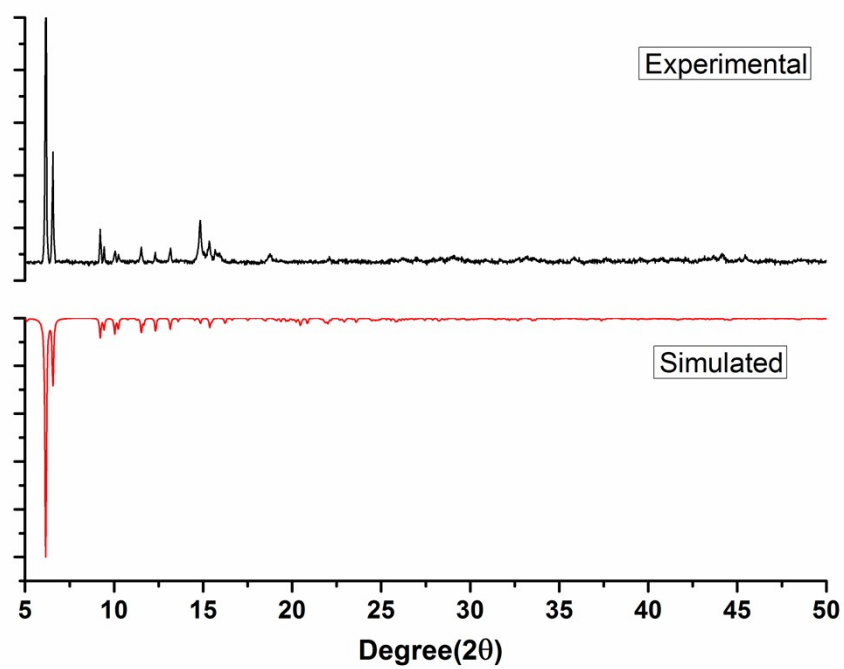

Fig. S2 Powder X-ray diffraction patterns of AQNU-4.

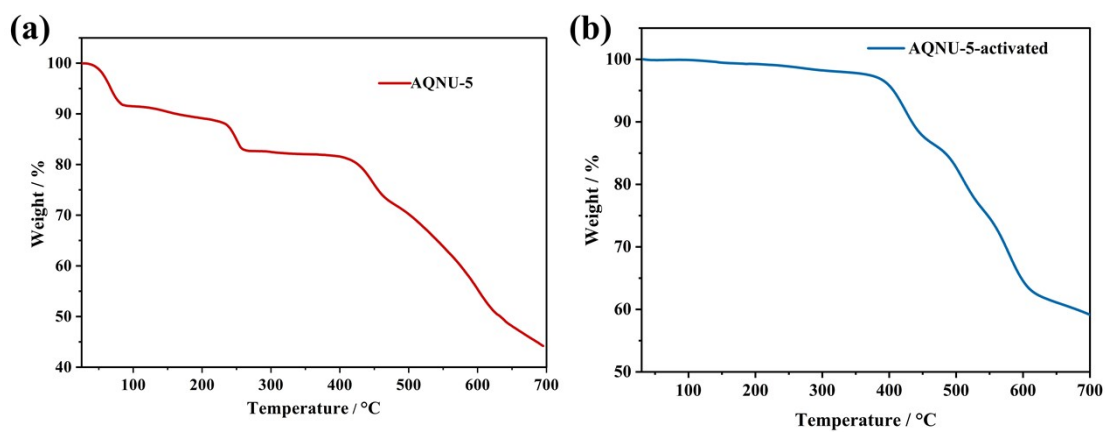

Fig. S3 Thermogravimetric curves of AQNU-4 before and after activation.

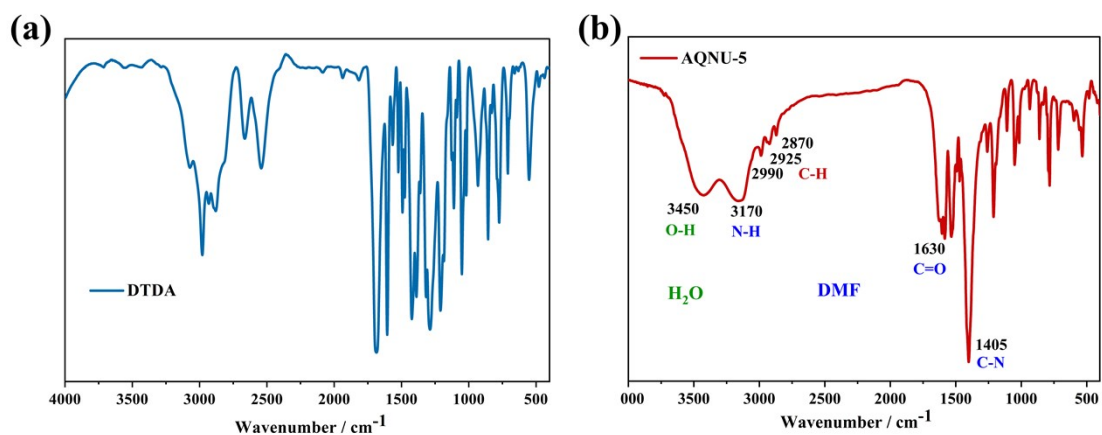

**Fig. S4** Infrared spectrum of ligand DTDA (a) and AQNU-4 (b).

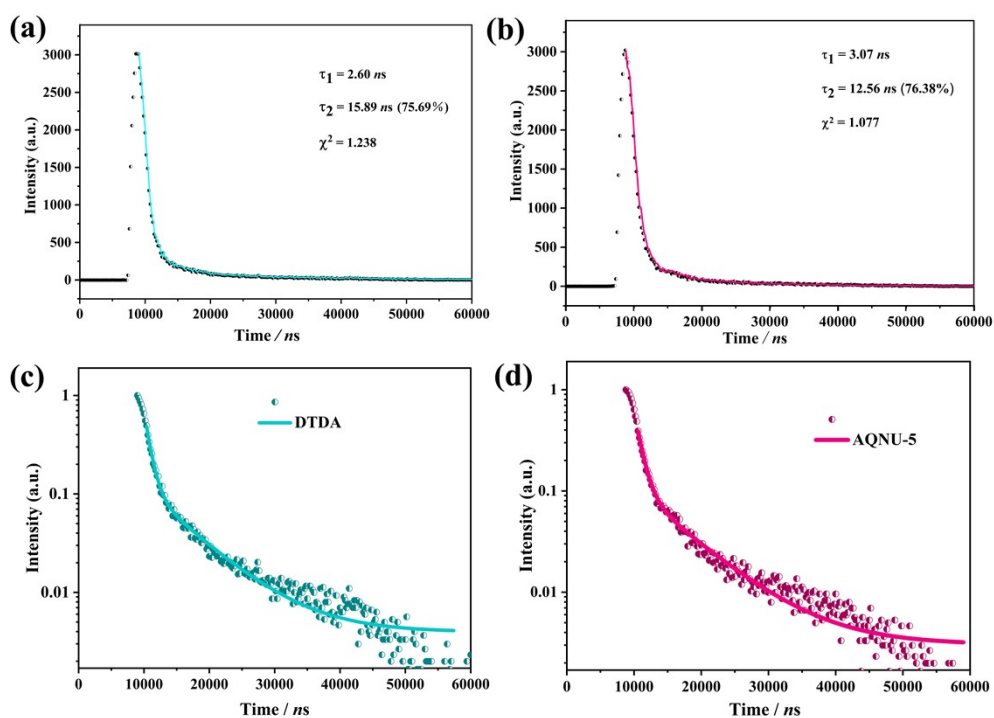

**Fig. S5** The fitted decay curve in the solid state at room temperature (monitored at 452 nm for DTDA ligand, (a, c); 425 nm for AQNU-4, (b, d)). The sample was excited at 343 nm. Scattered line: experimental data; Solid line: fitted by  $\text{Fit} = A + B_1 \times \exp(-t/\tau_1) + B_2 \times \exp(-t/\tau_2)$ .

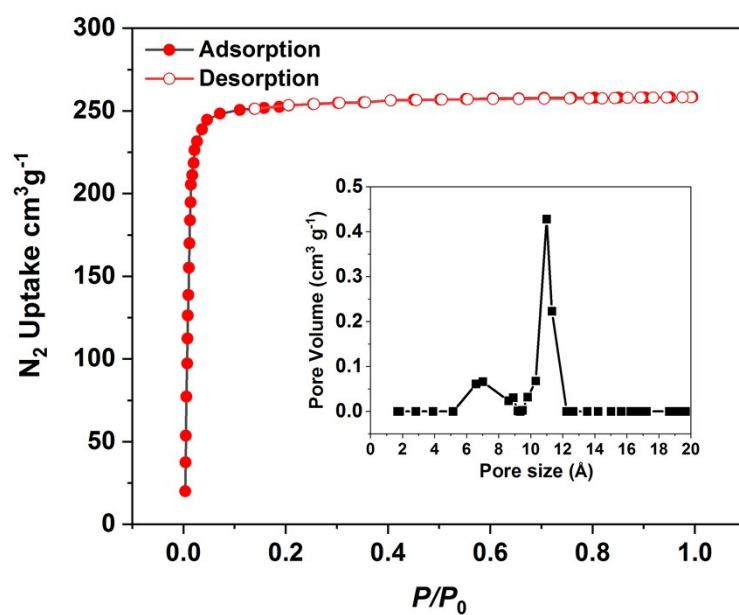

**Fig. S6**  $\text{N}_2$  sorption isotherm of AQNU-4 at 77 K and the corresponding pore diameter distribution (inset) based on DFT model.

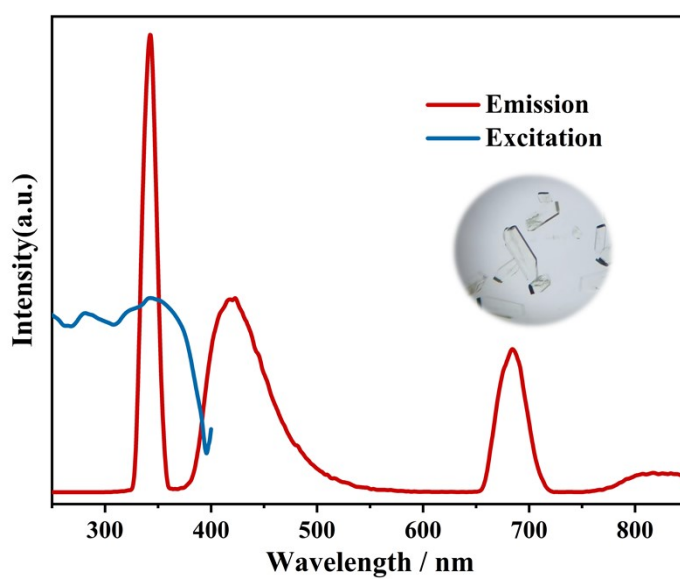

**Fig. S7** Fluorescence excitation and emission spectra of AQNU-4 (the inset picture shows a real shot).

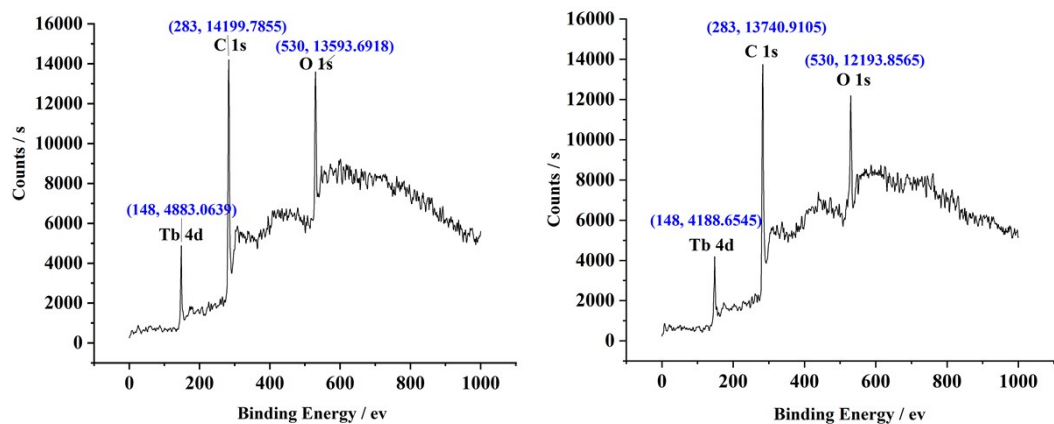

**Fig. S8** Survey XPS spectra of AQNU-4 before and after activation.

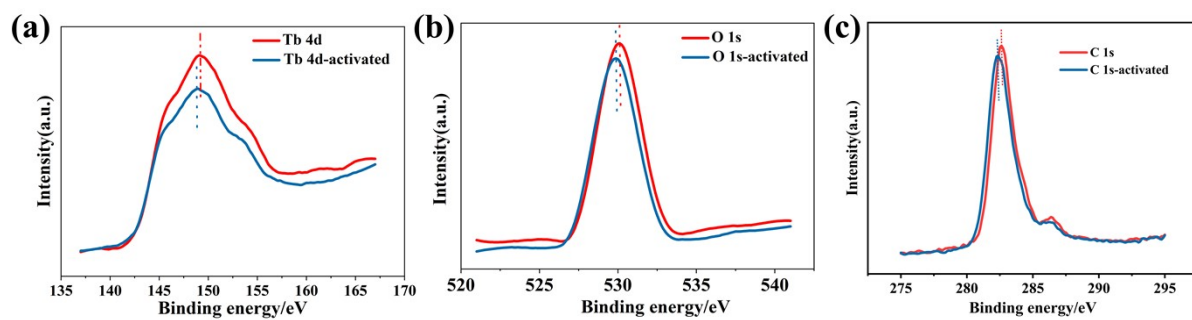

**Fig. S9** The Tb 4d (a), O 1s (b) and C 1s (c) XPS spectrum before and after activation.

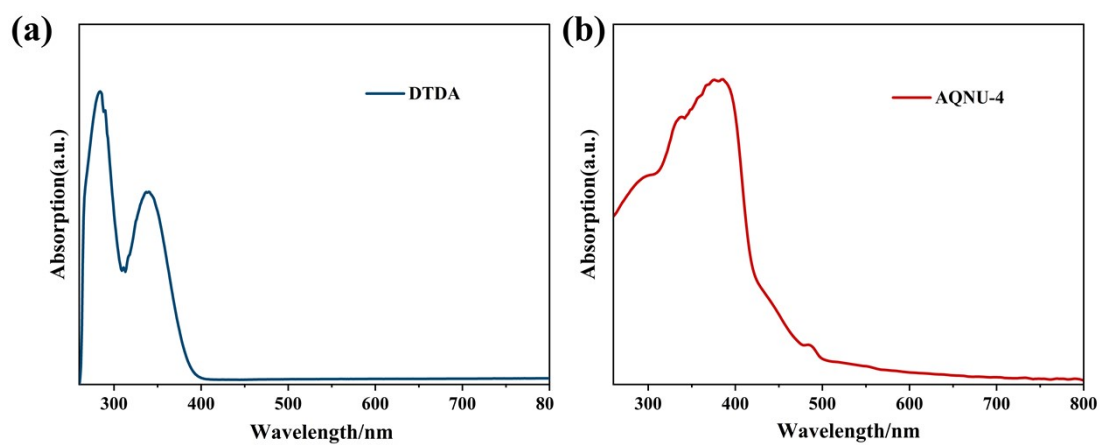

**Fig. S10** The UV-Vis absorption spectra of DTDA (a) and AQNU-4 (b).

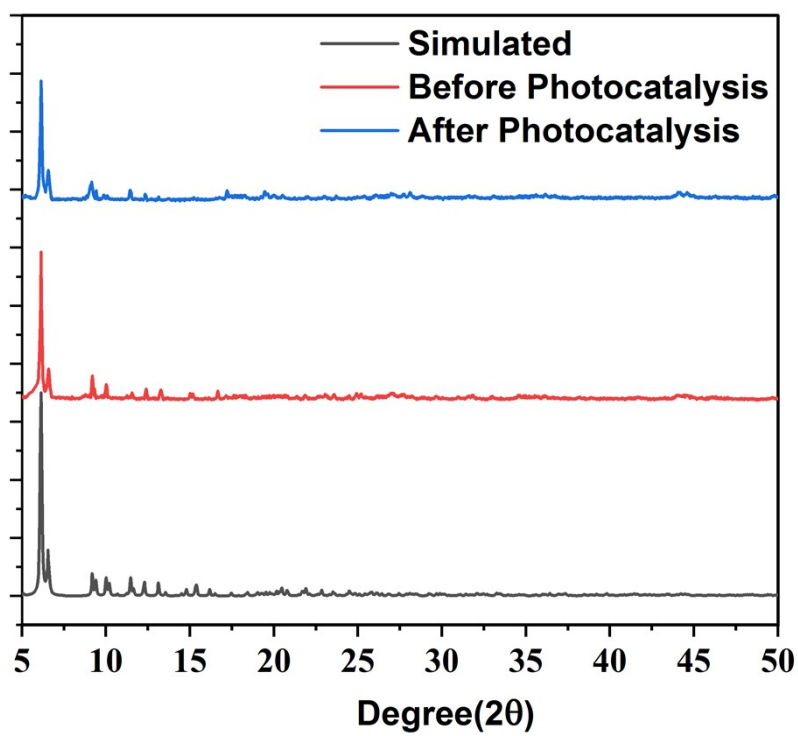

Fig. S11 PXRD of AQNU-4 post-photocatalysis in cyclohexanone.

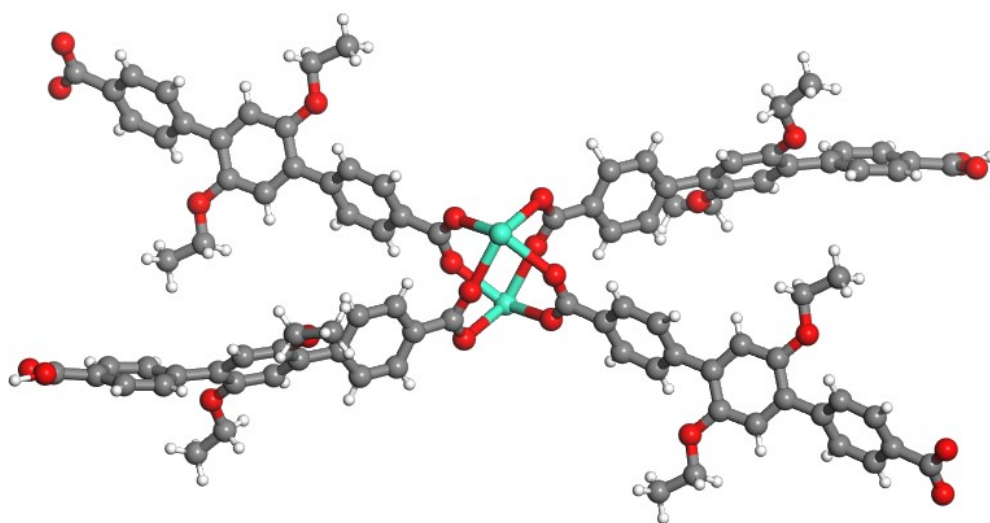

Fig. S12 The DFT computational model of structure AQNU-4.



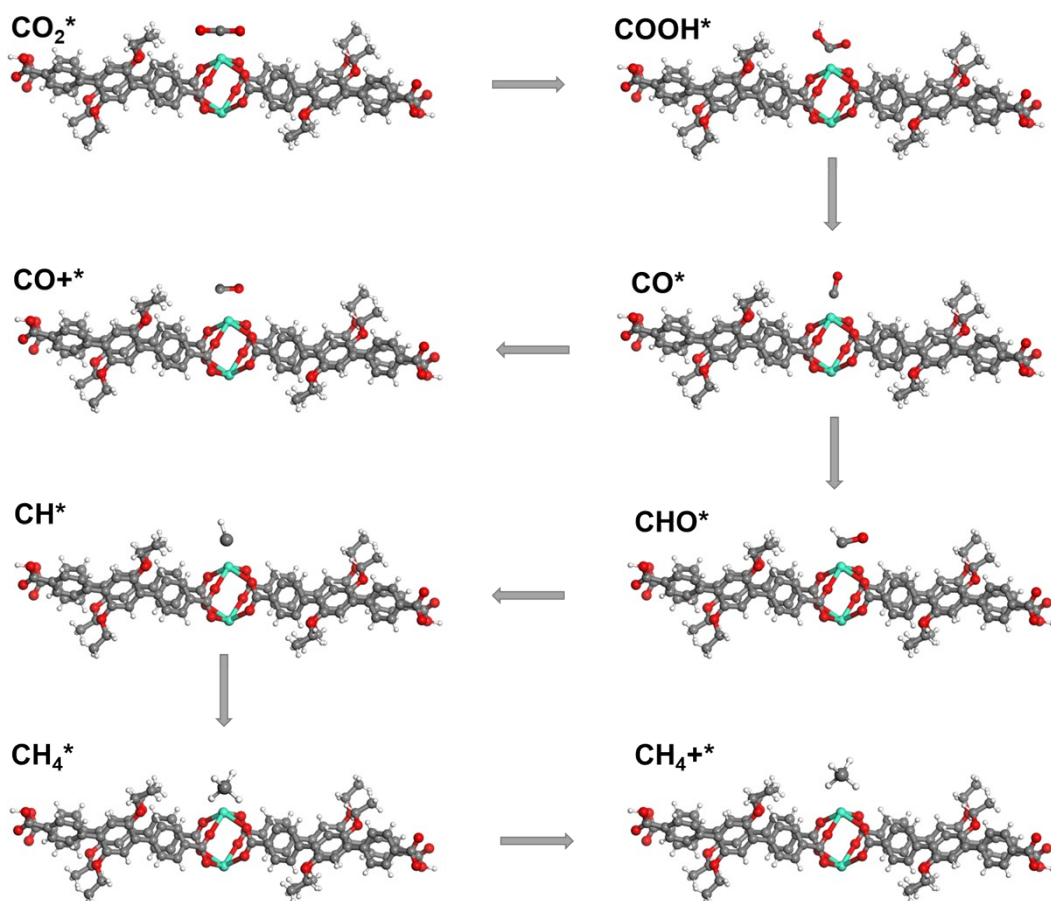

Fig. S13 Geometric configurations of AQNU-4 in the reaction path of photocatalysis CO<sub>2</sub> reduction.

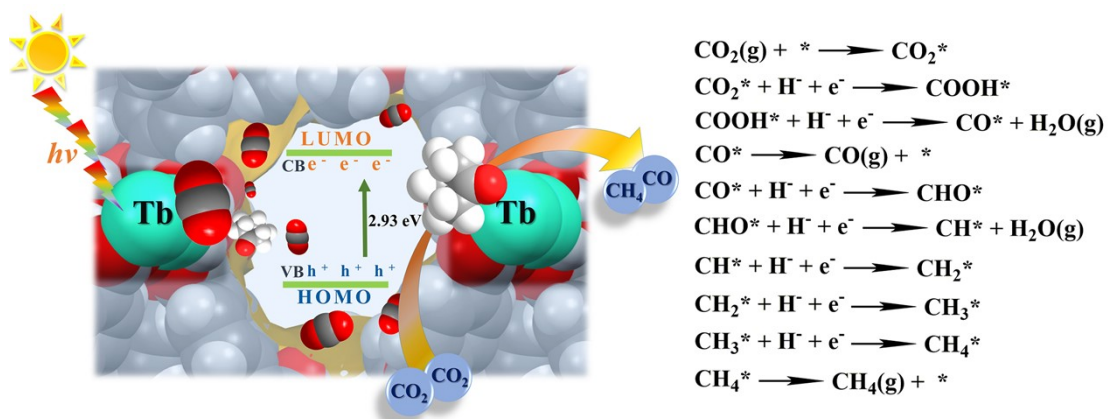

Fig. S14 The mechanistic path for CO<sub>2</sub> reduction reaction.
